# Supplementary material for: Lactic Starter Dose Shapes S. aureus and STEC O26:H11 Growth, and Bacterial Community Patterns in Raw Milk Uncooked Pressed Cheeses
Source: MDPI journal article supplement (doi:10.3390/microorganisms9051081), 2021-05-18
Supplement: s1 [file s1]

**Table S1.** Biochemical and microbial characteristics in the raw milk used ( $n = 3$ ). The differences according to the farm were estimated by a Wilcoxon's test ( $n = 6$ ). \* $p < 0.05$ ; \*\* $p < 0.01$ ; \*\*\* $p < 0.001$ ; tendency; ns non-significant. NC Non calculable because under the detection threshold by plate counting <sup>a</sup>  $< 10$  UFC/mL; <sup>b</sup>  $< 5$  UFC/mL.

|                                                |                                            | Mean<br>F_15         | SD F_15              | Mean<br>F_38         | SD F_38              | Mean                 | SD                   | Farm<br>effect  |
|------------------------------------------------|--------------------------------------------|----------------------|----------------------|----------------------|----------------------|----------------------|----------------------|-----------------|
| Biochemical<br>characteristics of raw<br>milks | pH                                         | 6.68                 | 0.02                 | 6.65                 | 0.02                 | 6.66                 | 0.02                 | 0.268 (ns)      |
|                                                | Dry matter (%)                             | 12.33                | 0.31                 | 12.77                | 0.35                 | 12.55                | 0.38                 | 0.268 (ns)      |
|                                                | Lactose (g/L)                              | 50.70                | 0.66                 | 50.57                | 0.81                 | 50.63                | 0.66                 | 0.825 (ns)      |
|                                                | Fat (g/L)                                  | 37.5                 | 2.3                  | 39.0                 | 3.8                  | 38.2                 | 2.9                  | 0.507 (ns)      |
|                                                | Protein (g/L)                              | 34.2                 | 1.0                  | 34.9                 | 2.5                  | 34.6                 | 1.7                  | 1.000 (ns)      |
|                                                | Fat/Protein ratio                          | 1.09                 | 0.07                 | 1.12                 | 0.12                 | 1.11                 | 0.09                 | 1.000 (ns)      |
|                                                | Urea (mg/L)                                | 208                  | 13                   | 197                  | 15                   | 203                  | 14                   | 0.506 (ns)      |
|                                                | Somatic cells (/mL)                        | 233667               | 167506               | 227333               | 338400               | 230500               | 238833               | 0.700 (ns)      |
|                                                | casein (g/L)                               | 31.19                | 0.94                 | 31.78                | 2.25                 | 31.49                | 1.58                 | 0.825 (ns)      |
|                                                | Lipolysis (mEq/100mg of fat)               | 0.18                 | 0.09                 | 0.28                 | 0.13                 | 0.23                 | 0.11                 | 0.700 (ns)      |
| Fatty acids profiles in<br>raw milks           | total unsaturated (g/L)                    | 10.11                | 0.52                 | 10.29                | 0.41                 | 10.20                | 0.43                 | 0.400 (ns)      |
|                                                | mono-unsaturated (g/L)                     | 8.02                 | 0.78                 | 8.02                 | 0.49                 | 8.02                 | 0.58                 | 1.000 (ns)      |
|                                                | poly-unsaturated (g/L)                     | 1.18                 | 0.10                 | 1.19                 | 0.10                 | 1.18                 | 0.09                 | 1.000 (ns)      |
|                                                | total saturated (g/L)                      | 25.49                | 1.92                 | 26.71                | 3.34                 | 26.10                | 2.52                 | 0.700 (ns)      |
| Microbial<br>characteristics of raw<br>milks   | Total germs (CFU/mL)                       | 1.30x10 <sup>4</sup> | 1.73x10 <sup>3</sup> | 6.33x10 <sup>3</sup> | 1.53x10 <sup>3</sup> | 9.67x10 <sup>3</sup> | 3.93x10 <sup>3</sup> | 0.077 (.)       |
|                                                | coagulase + <i>Staphylococcus</i> (CFU/mL) | 1.04x10 <sup>2</sup> | 1.52x10 <sup>2</sup> | 6.16x10 <sup>2</sup> | 1.03x10 <sup>3</sup> | 3.60x10 <sup>2</sup> | 7.18x10 <sup>2</sup> | 0.700 (ns)      |
|                                                | <i>E. coli</i> (CFU/mL)                    | NC <sup>a</sup>      | NC <sup>a</sup> |
|                                                | STEC (CFU/mL)                              | NC <sup>b</sup>      | NC <sup>b</sup> |
| Pathogens levels in<br>inoculated milks        | <i>S.aureus</i>                            | 9.30x10 <sup>2</sup> | 5.47x10 <sup>2</sup> | 6.37x10 <sup>2</sup> | 5.11x10 <sup>1</sup> | 7.84x10 <sup>2</sup> | 3.82x10 <sup>2</sup> | 0.886 (ns)      |
|                                                | STEC O26:H11                               | 1.04x10 <sup>2</sup> | 2.13x10 <sup>1</sup> | 1.13x10 <sup>2</sup> | 2.64x10 <sup>1</sup> | 1.08x10 <sup>2</sup> | 2.21x10 <sup>1</sup> | 1.000 (ns)      |

**Table S2.** pH values, dry matter content (%), coagulase + *S. aureus* and STEC O26:H11 levels (CFU/g) and Young's modulus values (MPa) in the inoculated and control cheeses at D0.25 (pH only) D1 and D28. The differences according to the lactic starter dose were estimated by Kruskal-Wallis' tests ( $n=6$ ), and according to the farm by Wilcoxon's tests ( $n=6$ ). \* $p < 0.05$ ; \*\* $p < 0.01$ ; \*\*\* $p < 0.001$ ; . tendency; ns non-significant. NC <sup>a</sup> Non calculable because under the detection threshold by plate counting; NC <sup>b</sup> Non calculable because of only one available value; NC <sup>c</sup> Non calculable because of too small number of available values; <sup>d</sup> only tested with data from the F\_38.

|                                     |                    |       | x0,1-Dose            |                      |                      |                      | x0,1-Dose            |                      | x1-Dose              |                      |                      |                      | x1-Dose              |                      | x2-Dose              |                      |                      |                      | x2-Dose              |                      | Dose Effect             | Farm Effect                 | Dose x Farm     | Time Effect                 | Time x Dose                  | Time x Farm     | Time x Dose x Farm | Inoculation Effect |
|-------------------------------------|--------------------|-------|----------------------|----------------------|----------------------|----------------------|----------------------|----------------------|----------------------|----------------------|----------------------|----------------------|----------------------|----------------------|----------------------|----------------------|----------------------|----------------------|----------------------|----------------------|-------------------------|-----------------------------|-----------------|-----------------------------|------------------------------|-----------------|--------------------|--------------------|
|                                     |                    |       | Mean F_15            | SD F_15              | Mean F_38            | SD F_38              | Mean                 | SD                   | Mean F_15            | SD F_15              | Mean F_38            | SD F_38              | Mean                 | SD                   | Mean F_15            | SD F_15              | Mean F_38            | SD F_38              | Mean                 | SD                   |                         |                             |                 |                             |                              |                 |                    |                    |
| pH values                           | Inoculated cheeses | D0,25 | 6.54                 | 0.06                 | 6.51                 | 0.02                 | 6.53                 | 0.04                 |                      |                      |                      |                      |                      |                      |                      |                      |                      |                      |                      |                      | 0,002 (**)              | 0,859 (ns)                  | 0,961 (ns)      |                             |                              |                 |                    |                    |
|                                     |                    | D1    | 5.36                 | 0.12                 | 5.58                 | 0.11                 | 5.47                 | 0.16                 | 5.24                 | 0.08                 | 5.23                 | 0.04                 | 5.23                 | 0.05                 | 5.17                 | 0.05                 | 5.22                 | 0.04                 | 5.19                 | 0.04                 | 0,006 (**)              | 0,413 (ns)                  | 0,077 (.)       | 3,17x10 <sup>-8</sup> (***) | 5,10x10 <sup>-13</sup> (***) | 0,021 (*)       | 0,351 (ns)         | 0,722 (ns)         |
|                                     |                    | D28   | 5.16                 | 0.05                 | 5.32                 | 0.02                 | 5.24                 | 0.10                 | 5.23                 | 0.03                 | 5.38                 | 0.04                 | 5.30                 | 0.09                 | 5.24                 | 0.04                 | 5.40                 | 0.04                 | 5.32                 | 0.10                 | 0,335 (ns)              | 3,82x10 <sup>-4</sup> (***) | 0,912 (ns)      |                             |                              |                 |                    |                    |
|                                     | Control cheeses    | D0,25 | 6.51                 | 0.03                 | 6.49                 | 0.01                 | 6.50                 | 0.02                 | 5.79                 | 0.18                 | 5.94                 | 0.21                 | 5.86                 | 0.19                 | 5.68                 | 0.09                 | 5.82                 | 0.12                 | 5.75                 | 0.13                 | 0,003 (**)              | 0,566 (ns)                  | 0,469 (ns)      | 6,49x10 <sup>-8</sup> (***) | 3,27x10 <sup>-10</sup> (***) | 0,708 (ns)      | 0,119 (ns)         |                    |
|                                     |                    | D1    | 5.38                 | 0.21                 | 5.64                 | 0.16                 | 5.51                 | 0.22                 | 5.20                 | 0.08                 | 5.26                 | 0.03                 | 5.23                 | 0.06                 | 5.17                 | 0.04                 | 5.20                 | 0.04                 | 5.19                 | 0.04                 | 0,009 (**)              | 0,184 (ns)                  | 0,217 (ns)      |                             |                              |                 |                    |                    |
|                                     |                    | D28   | 5.21                 | 0.04                 | 5.30                 | 0.06                 | 5.26                 | 0.06                 | 5.21                 | 0.06                 | 5.43                 | 0.04                 | 5.32                 | 0.13                 | 5.22                 | 0.04                 | 5.36                 | 0.02                 | 5.29                 | 0.08                 | 0,602 (ns)              | 0,001 (***)                 | 0,048 (*)       |                             |                              |                 |                    |                    |
| Dry matter content                  | Inoculated cheeses | D1    | 50.73                | 1.12                 | 50.80                | 0.92                 | 50.77                | 0.91                 | 51.53                | 0.51                 | 52.00                | 0.26                 | 51.77                | 0.45                 | 52.07                | 0.40                 | 51.47                | 1.04                 | 51.77                | 0.78                 | 0,062 (.)               | 1,000 (ns)                  | 0,510 (ns)      | 0,014 (*)                   | 0,013 (*)                    | 0,350 (ns)      | 0,873 (ns)         | 0,624 (ns)         |
|                                     |                    | D28   | 50.20                | 0.36                 | 51.57                | 0.40                 | 50.88                | 0.82                 | 53.50                | 0.85                 | 54.37                | 1.16                 | 53.93                | 1.03                 | 54.90                | 1.66                 | 54.80                | 2.69                 | 54.85                | 2.00                 | 0,004 (**)              | 0,508 (ns)                  | 0,676 (ns)      |                             |                              |                 |                    |                    |
|                                     | Control cheeses    | D1    | 51.07                | 0.45                 | 50.10                | 0.92                 | 50.58                | 0.84                 | 52.43                | 0.67                 | 51.73                | 1.04                 | 52.08                | 0.87                 | 52.10                | 0.87                 | 51.67                | 1.29                 | 51.88                | 1.01                 | 0,040 (*)               | 0,121 (ns)                  | 0,881 (ns)      | 9,79x10 <sup>-5</sup> (***) | 0,729 (ns)                   | 0,633 (ns)      | 0,735 (ns)         |                    |
|                                     |                    | D28   | 51.27                | 0.38                 | 51.07                | 1.02                 | 51.17                | 0.70                 | 53.07                | 1.01                 | 53.13                | 2.25                 | 53.10                | 1.56                 | 53.63                | 1.46                 | 52.73                | 0.45                 | 53.18                | 1.09                 | 0,015 (*)               | 0,691 (ns)                  | 0,796 (ns)      |                             |                              |                 |                    |                    |
| coagulase + <i>S. aureus</i> levels | Inoculated cheeses | D1    | 1.30x10 <sup>6</sup> | 2.11x10 <sup>6</sup> | 2.60x10 <sup>6</sup> | 2.94x10 <sup>6</sup> | 1.95x10 <sup>6</sup> | 2.40x10 <sup>6</sup> | 2.74x10 <sup>5</sup> | 3.87x10 <sup>5</sup> | 3.45x10 <sup>5</sup> | 4.56x10 <sup>5</sup> | 3.09x10 <sup>5</sup> | 3.80x10 <sup>5</sup> | 1.17x10 <sup>5</sup> | 1.51x10 <sup>5</sup> | 1.34x10 <sup>5</sup> | 1.12x10 <sup>5</sup> | 1.25x10 <sup>5</sup> | 1.19x10 <sup>5</sup> | 0,182 (ns)              | 0,258 (ns)                  | 0,711 (ns)      | 0,003 (**)                  | 0,122 (ns)                   | 0,558 (ns)      | 0,746 (ns)         | NC <sup>c</sup>    |
|                                     |                    | D28   | 9.83x10 <sup>4</sup> | 3.33x10 <sup>4</sup> | 2.07x10 <sup>5</sup> | 1.54x10 <sup>5</sup> | 1.53x10 <sup>5</sup> | 1.16x10 <sup>5</sup> | 1.50x10 <sup>4</sup> | 4.00x10 <sup>3</sup> | 3.07x10 <sup>4</sup> | 1.59x10 <sup>4</sup> | 2.28x10 <sup>4</sup> | 1.35x10 <sup>4</sup> | 2.27x10 <sup>4</sup> | 5.77x10 <sup>3</sup> | 2.40x10 <sup>4</sup> | 1.08x10 <sup>4</sup> | 2.33x10 <sup>4</sup> | 7.79x10 <sup>3</sup> | 0,003 (**)              | 0,331 (ns)                  | 0,334 (ns)      |                             |                              |                 |                    |                    |
|                                     | Control cheeses    | D1    | < 1000               | NC <sup>a</sup>      | 2.27x10 <sup>6</sup> | 3.71x10 <sup>6</sup> | NC <sup>b</sup>      | NC <sup>b</sup>      | 3.16x10 <sup>5</sup> | 4.44x10 <sup>5</sup> | 1.88x10 <sup>5</sup> | 2.87x10 <sup>5</sup> | 2.39x10 <sup>5</sup> | 3.09x10 <sup>5</sup> | < 100                | NC <sup>a</sup>      | 7.42x10 <sup>4</sup> | 1.00x10 <sup>5</sup> | NC <sup>b</sup>      | NC <sup>b</sup>      | 0,404 (ns) <sup>d</sup> | NC <sup>c</sup>             | NC <sup>c</sup> | NC <sup>c</sup>             | NC <sup>c</sup>              | NC <sup>c</sup> | NC <sup>c</sup>    |                    |
|                                     |                    | D28   | < 1000               | NC <sup>a</sup>      | 3.70x10 <sup>5</sup> | NC <sup>b</sup>      | NC <sup>b</sup>      | NC <sup>b</sup>      | < 100                | NC <sup>a</sup>      | 9.00x10 <sup>5</sup> | NC <sup>b</sup>      | NC <sup>b</sup>      | NC <sup>b</sup>      | < 100                | NC <sup>a</sup>      | 3.95x10 <sup>5</sup> | NC <sup>b</sup>      | NC <sup>b</sup>      | NC <sup>b</sup>      | NC <sup>c</sup>         | NC <sup>c</sup>             | NC <sup>c</sup> | NC <sup>c</sup>             | NC <sup>c</sup>              | NC <sup>c</sup> | NC <sup>c</sup>    |                    |
| STEC O26:H11 levels                 | Inoculated cheeses | D1    | 1.39x10 <sup>7</sup> | 7.77x10 <sup>6</sup> | 4.11x10 <sup>7</sup> | 6.40x10 <sup>6</sup> | 2.75x10 <sup>7</sup> | 1.62x10 <sup>7</sup> | 3.35x10 <sup>5</sup> | 1.44x10 <sup>5</sup> | 1.22x10 <sup>6</sup> | 1.76x10 <sup>6</sup> | 7.75x10 <sup>5</sup> | 1.21x10 <sup>5</sup> | 1.10x10 <sup>5</sup> | 4.94x10 <sup>5</sup> | 2.82x10 <sup>5</sup> | 3.36x10 <sup>5</sup> | 1.96x10 <sup>5</sup> | 2.35x10 <sup>5</sup> | 0,002 (**)              | 0,605 (ns)                  | NC <sup>c</sup> | 0,696 (ns)                  | 0,529 (ns)                   | 0,863 (ns)      | 0,952 (ns)         | NC <sup>c</sup>    |
|                                     |                    | D28   | 1.90x10 <sup>7</sup> | 2.35x10 <sup>7</sup> | 4.98x10 <sup>7</sup> | 1.65x10 <sup>7</sup> | 3.44x10 <sup>7</sup> | 2.48x10 <sup>7</sup> | 2.12x10 <sup>5</sup> | 1.78x10 <sup>5</sup> | 6.28x10 <sup>5</sup> | 6.42x10 <sup>5</sup> | 4.20x10 <sup>5</sup> | 4.79x10 <sup>5</sup> | 6.16x10 <sup>4</sup> | 4.11x10 <sup>4</sup> | 1.58x10 <sup>5</sup> | 1.48x10 <sup>5</sup> | 1.10x10 <sup>5</sup> | 1.10x10 <sup>5</sup> | 0,001 (**)              | 0,340 (ns)                  | NC <sup>c</sup> |                             |                              |                 |                    |                    |
|                                     | Control cheeses    | D1    | <100                 | NC <sup>a</sup>      | <1000                | NC <sup>a</sup>      | NC <sup>a</sup>      | NC <sup>a</sup>      | < 100                | NC <sup>a</sup>      | < 100                | NC <sup>a</sup>      | NC <sup>a</sup>      | NC <sup>a</sup>      | < 100                | NC <sup>a</sup>      | <100                 | NC <sup>a</sup>      | NC <sup>a</sup>      | NC <sup>a</sup>      | NC <sup>c</sup>         | NC <sup>c</sup>             | NC <sup>c</sup> | NC <sup>c</sup>             | NC <sup>c</sup>              | NC <sup>c</sup> | NC <sup>c</sup>    |                    |
|                                     |                    | D28   | < 100                | NC <sup>a</sup>      | < 1000               | NC <sup>a</sup>      | NC <sup>a</sup>      | NC <sup>a</sup>      | < 100                | NC <sup>a</sup>      | < 100                | NC <sup>a</sup>      | NC <sup>a</sup>      | NC <sup>a</sup>      | < 100                | NC <sup>a</sup>      | < 100                | NC <sup>a</sup>      | NC <sup>a</sup>      | NC <sup>a</sup>      | NC <sup>c</sup>         | NC <sup>c</sup>             | NC <sup>c</sup> | NC <sup>c</sup>             | NC <sup>c</sup>              | NC <sup>c</sup> | NC <sup>c</sup>    |                    |
| Young's modulus                     | Control cheeses    | D28   | 0.313                | 0.401                | 0.285                | 0.132                | 0.299                | 0.298                | 0.312                | 0.316                | 0.445                | 0.249                | 0.377                | 0.290                | 0.358                | 0.388                | 0.470                | 0.223                | 0.414                | 0.318                | 0,006 (**)              | 3.31x10 <sup>-5</sup> (***) | 0.420 (ns)      |                             |                              |                 |                    |                    |

**Table S3.** Microbial counts (CFU/g) at D28 in the control cheese cores and rinds. The differences according to the lactic starter dose were estimated by Kruskal-Wallis' tests ( $n = 6$ ), and according to the farm by Wilcoxon's tests ( $n = 6$ ). \* $p < 0.05$ ; \*\* $p < 0.01$ ; \*\*\* $p < 0.001$ ; . tendency; ns non-significant. NC <sup>a</sup> Non calculable because of only one available value.

|                         |                           | x0.1-Dose            |                      |                      |                      | x0.1-Dose            |                      | x1-Dose              |                      |                      |                      | x1-Dose              |                      | x2-Dose              |                      |                      |                      | x2-Dose              |                      | Dose Effect | Farm Effect | Dose x Farm |
|-------------------------|---------------------------|----------------------|----------------------|----------------------|----------------------|----------------------|----------------------|----------------------|----------------------|----------------------|----------------------|----------------------|----------------------|----------------------|----------------------|----------------------|----------------------|----------------------|----------------------|-------------|-------------|-------------|
|                         |                           | Mean F_15            | SD F_15              | Mean F_38            | SD F_38              | Mean                 | SD                   | Mean F_15            | SD F_15              | Mean F_38            | SD F_38              | Mean                 | SD                   | Mean F_15            | SD F_15              | Mean F_38            | SD F_38              | Mean                 | SD                   |             |             |             |
| D28 Control Cheese Core | Thermophilic Streptococci | 1.47x10 <sup>8</sup> | 2.33x10 <sup>7</sup> | 9.93x10 <sup>8</sup> | 8.33x10 <sup>8</sup> | 5.7x10 <sup>8</sup>  | 7.02x10 <sup>8</sup> | 8.83x10 <sup>8</sup> | 1.62x10 <sup>8</sup> | 1.47x10 <sup>9</sup> | 5.73x10 <sup>8</sup> | 1.17x10 <sup>9</sup> | 4.94x10 <sup>8</sup> | 1.28x10 <sup>9</sup> | 3.00x10 <sup>8</sup> | 1.54x10 <sup>9</sup> | 3.69x10 <sup>8</sup> | 1.41x10 <sup>9</sup> | 3.33x10 <sup>8</sup> | 0.046 (*)   | 0.077 (.)   | 0.562 (ns)  |
|                         | Lactic bacteria           | 1.27x10 <sup>9</sup> | 5.91x10 <sup>8</sup> | 7.21x10 <sup>8</sup> | 2.68x10 <sup>8</sup> | 9.94x10 <sup>8</sup> | 5.08x10 <sup>8</sup> | 1.01x10 <sup>9</sup> | 2.68x10 <sup>8</sup> | 9.4x10 <sup>8</sup>  | 7.96x10 <sup>8</sup> | 9.75x10 <sup>8</sup> | 5.33x10 <sup>8</sup> | 9.39x10 <sup>8</sup> | 4.24x10 <sup>8</sup> | 5.96x10 <sup>8</sup> | 4.81x10 <sup>8</sup> | 7.67x10 <sup>8</sup> | 4.47x10 <sup>8</sup> | 0.614 (ns)  | 0.102 (ns)  | 0.722 (ns)  |
|                         | Yeasts                    | 2.14x10 <sup>5</sup> | 2.56x10 <sup>5</sup> | 9.04x10 <sup>7</sup> | 1.38x10 <sup>8</sup> | 4.53x10 <sup>7</sup> | 1x10 <sup>8</sup>    | 1.77x10 <sup>5</sup> | 2.72x10 <sup>5</sup> | 4.96x10 <sup>6</sup> | 4.85x10 <sup>6</sup> | 2.57x10 <sup>6</sup> | 4.04x10 <sup>6</sup> | 5.43x10 <sup>4</sup> | 3.6x10 <sup>4</sup>  | 5.08x10 <sup>5</sup> | 4.32x10 <sup>5</sup> | 2.81x10 <sup>5</sup> | 3.7x10 <sup>5</sup>  | 0.331 (ns)  | 0.003 (**)  | 0.335 (ns)  |
|                         | Molds                     | 5.68x10 <sup>4</sup> | 3.89x10 <sup>4</sup> | 9.3x10 <sup>4</sup>  | NC <sup>a</sup>      | 6.59x10 <sup>4</sup> | 3.66x10 <sup>4</sup> | 5.5x10 <sup>4</sup>  | 4.06x10 <sup>4</sup> | 2.03x10 <sup>5</sup> | 6.72x10 <sup>4</sup> | 1.14x10 <sup>5</sup> | 9.21x10 <sup>4</sup> | 4.22x10 <sup>4</sup> | 3.87x10 <sup>4</sup> | 2.64x10 <sup>5</sup> | 3.06x10 <sup>5</sup> | 1.53x10 <sup>5</sup> | 2.3x10 <sup>5</sup>  | 0.682 (ns)  | 0.026 (*)   | 0.688 (ns)  |
|                         | Ripening bacteria         | 2.01x10 <sup>7</sup> | 2.24x10 <sup>7</sup> | 1.17x10 <sup>8</sup> | 7.55x10 <sup>7</sup> | 6.87x10 <sup>7</sup> | 7.29x10 <sup>7</sup> | 9.3x10 <sup>5</sup>  | 1.18x10 <sup>6</sup> | 1.83x10 <sup>7</sup> | 1.53x10 <sup>7</sup> | 9.62x10 <sup>6</sup> | 1.36x10 <sup>7</sup> | 7.57x10 <sup>5</sup> | 6.31x10 <sup>5</sup> | 7.21x10 <sup>6</sup> | 3.19x10 <sup>6</sup> | 3.98x10 <sup>6</sup> | 4.09x10 <sup>6</sup> | 0.030 (*)   | 0.006 (**)  | 0.066 (.)   |
| D28 Control Cheese Rind | Thermophilic Streptococci | 1.95x10 <sup>8</sup> | 2.19x10 <sup>8</sup> | 4.57x10 <sup>8</sup> | 2.28x10 <sup>8</sup> | 3.26x10 <sup>8</sup> | 2.46x10 <sup>8</sup> | 1.73x10 <sup>7</sup> | 4.04x10 <sup>6</sup> | 3.47x10 <sup>8</sup> | 2.59x10 <sup>8</sup> | 1.82x10 <sup>8</sup> | 2.43x10 <sup>8</sup> | 1.03x10 <sup>8</sup> | 8.64x10 <sup>7</sup> | 3.09x10 <sup>8</sup> | 6.48x10 <sup>8</sup> | 2.06x10 <sup>8</sup> | 1.32x10 <sup>8</sup> | 0.244 (ns)  | 0.003 (**)  | 0.828 (ns)  |
|                         | Lactic bacteria           | 7.79x10 <sup>8</sup> | 3.42x10 <sup>8</sup> | 6.58x10 <sup>8</sup> | 3.05x10 <sup>8</sup> | 7.18x10 <sup>8</sup> | 2.97x10 <sup>8</sup> | 8.02x10 <sup>8</sup> | 2.23x10 <sup>8</sup> | 5.8x10 <sup>8</sup>  | 2.37x10 <sup>8</sup> | 6.91x10 <sup>8</sup> | 2.39x10 <sup>8</sup> | 8.48x10 <sup>8</sup> | 1.26x10 <sup>8</sup> | 3.25x10 <sup>8</sup> | 1.31x10 <sup>8</sup> | 5.87x10 <sup>8</sup> | 3.09x10 <sup>8</sup> | 0.653 (ns)  | 0.011 (*)   | 0.354 (ns)  |
|                         | Yeasts                    | 4.03x10 <sup>7</sup> | 1.21x10 <sup>7</sup> | 5.2x10 <sup>8</sup>  | 4.84x10 <sup>8</sup> | 2.8x10 <sup>8</sup>  | 4.03x10 <sup>8</sup> | 5.87x10 <sup>7</sup> | 1.76x10 <sup>7</sup> | 6.48x10 <sup>7</sup> | 1.3x10 <sup>7</sup>  | 6.18x10 <sup>7</sup> | 1.42x10 <sup>7</sup> | 6.33x10 <sup>7</sup> | 7.01x10 <sup>6</sup> | 9.28x10 <sup>7</sup> | 3.25x10 <sup>7</sup> | 7.81x10 <sup>7</sup> | 2.65x10 <sup>7</sup> | 0.673 (ns)  | 0.015 (*)   | 0.106 (ns)  |
|                         | Molds                     | 4.12x10 <sup>7</sup> | 1.53x10 <sup>6</sup> | 3.45x10 <sup>7</sup> | 4.82x10 <sup>6</sup> | 3.78x10 <sup>7</sup> | 4.85x10 <sup>6</sup> | 4.52x10 <sup>7</sup> | 1.11x10 <sup>7</sup> | 4.75x10 <sup>7</sup> | 1.8x10 <sup>6</sup>  | 4.63x10 <sup>7</sup> | 7.24x10 <sup>6</sup> | 4.77x10 <sup>7</sup> | 1.36x10 <sup>7</sup> | 5.58x10 <sup>7</sup> | 3.05x10 <sup>7</sup> | 5.18x10 <sup>7</sup> | 2.16x10 <sup>7</sup> | 0.173 (ns)  | 0.667 (ns)  | 0.681 (ns)  |
|                         | Ripening bacteria         | 2.74x10 <sup>9</sup> | 7.46x10 <sup>8</sup> | 3.8x10 <sup>9</sup>  | 1.87x10 <sup>9</sup> | 3.27x10 <sup>9</sup> | 1.4x10 <sup>9</sup>  | 4.56x10 <sup>8</sup> | 1.8x10 <sup>8</sup>  | 2.75x10 <sup>9</sup> | 6.45x10 <sup>8</sup> | 1.6x10 <sup>9</sup>  | 1.33x10 <sup>9</sup> | 6.71x10 <sup>8</sup> | 4.35x10 <sup>8</sup> | 2.53x10 <sup>9</sup> | 9.57x10 <sup>8</sup> | 1.6x10 <sup>9</sup>  | 1.22x10 <sup>9</sup> | 0.119 (ns)  | 0.012 (*)   | 0.545 (ns)  |

**Table S4.** Alpha-diversity indexes calculated from the bacterial profiles in the raw milk, the cheese cores and the cheese rinds according to the farm and the lactic starter dose. The *p*-value was calculated by an ANOVA. \**p* < 0.05; \*\**p* < 0.01; \*\*\**p* < 0.001; tendency; ns non-significant.

|             |      | Shannon's indexes |      |            |      |      |      |             |
|-------------|------|-------------------|------|------------|------|------|------|-------------|
|             |      | Farm              |      |            | Dose |      |      |             |
| Type        | Time | F_15              | F_38 | p-value    | x0.1 | x1   | x2   | p-value     |
| Raw milk    | D0   | 1.71              | 1.85 | 0.105 (ns) | -    | -    | -    | -           |
| Cheese Core | D8   | 0.36              | 0.64 | 0.093 (.)  | 1.28 | 0.14 | 0.08 | 0.001 (***) |
|             | D28  | 1.04              | 1.05 | 0.388 (ns) | 1.64 | 0.86 | 0.64 | 0.001 (***) |
| Cheese Rind | D28  | 1.63              | 1.28 | 0.940 (ns) | 1.81 | 1.56 | 1.00 | 0.086 (.)   |

|             |      | Simpson's index |      |            |      |      |      |             |
|-------------|------|-----------------|------|------------|------|------|------|-------------|
|             |      | Farm            |      |            | Dose |      |      |             |
| Type        | Time | F_15            | F_38 | p-value    | x0.1 | x1   | x2   | p-value     |
| Raw milk    | D0   | 0.65            | 0.75 | 0.116 (ns) | -    | -    | -    | -           |
| Cheese Core | D8   | 0.14            | 0.24 | 0.139 (ns) | 0.51 | 0.04 | 0.02 | 0.001 (***) |
|             | D28  | 0.46            | 0.40 | 0.912 (ns) | 0.67 | 0.36 | 0.26 | 0.001 (***) |
| Cheese Rind | D28  | 0.67            | 0.50 | 0.717 (ns) | 0.74 | 0.63 | 0.39 | 0.039 (*)   |

|             |      | InvSimpson's index |      |            |      |      |      |             |
|-------------|------|--------------------|------|------------|------|------|------|-------------|
|             |      | Farm               |      |            | Dose |      |      |             |
| Type        | Time | F_15               | F_38 | p-value    | x0.1 | x1   | x2   | p-value     |
| Raw milk    | D0   | 3.28               | 5.18 | 0.570 (ns) | -    | -    | -    | -           |
| Cheese Core | D8   | 1.26               | 1.81 | 0.097 (.)  | 2.54 | 1.05 | 1.02 | 0.018 (*)   |
|             | D28  | 2.05               | 2.15 | 0.385 (ns) | 3.31 | 1.60 | 1.38 | 0.001 (***) |
| Cheese Rind | D28  | 4.24               | 2.61 | 0.416 (ns) | 4.62 | 3.65 | 2.01 | 0.101 (ns)  |

|             |      | Observed |       |            |       |       |       |            |
|-------------|------|----------|-------|------------|-------|-------|-------|------------|
|             |      | Farm     |       |            | Dose  |       |       |            |
| Type        | Time | F_15     | F_38  | p-value    | x0.1  | x1    | x2    | p-value    |
| Raw milk    | D0   | 20.56    | 13.33 | 0.037 (*)  | -     | -     | -     | -          |
| Cheese Core | D8   | 14.22    | 19.11 | 0.032 (*)  | 27.17 | 12.33 | 10.50 | 0.005 (**) |
|             | D28  | 20.78    | 25.78 | 0.019 (*)  | 29.67 | 21.00 | 19.17 | 0.185 (ns) |
| Cheese Rind | D28  | 25.11    | 25.89 | 0.325 (ns) | 28.50 | 26.67 | 21.33 | 0.416 (ns) |

|             |      | Chao1 |       |            |       |       |       |            |
|-------------|------|-------|-------|------------|-------|-------|-------|------------|
|             |      | Farm  |       |            | Dose  |       |       |            |
| Type        | Time | F_15  | F_38  | p-value    | x0.1  | x1    | x2    | p-value    |
| Raw milk    | D0   | 20.56 | 13.33 | 0.038 (*)  | -     | -     | -     | -          |
| Cheese Core | D8   | 14.22 | 19.17 | 0.033 (*)  | 27.25 | 12.33 | 10.50 | 0.005 (**) |
|             | D28  | 20.78 | 25.89 | 0.017 (*)  | 29.83 | 21.00 | 19.17 | 0.174 (ns) |
| Cheese Rind | D28  | 25.15 | 26.00 | 0.318 (ns) | 28.56 | 26.83 | 21.33 | 0.411 (ns) |

|             |      | ACE   |       |            |       |       |       |            |
|-------------|------|-------|-------|------------|-------|-------|-------|------------|
|             |      | Farm  |       |            | Dose  |       |       |            |
| Type        | Time | F_15  | F_38  | p-value    | x0.1  | x1    | x2    | p-value    |
| Raw milk    | D0   | 20.71 | 13.58 | 0.050 (.)  | -     | -     | -     | -          |
| Cheese Core | D8   | 15.06 | 20.65 | 0.031 (*)  | 27.29 | 12.42 | 11.86 | 0.138 (ns) |
|             | D28  | 22.29 | 26.08 | 0.054 (.)  | 32.82 | 21.00 | 20.13 | 0.033 (*)  |
| Cheese Rind | D28  | 25.54 | 26.26 | 0.317 (ns) | 28.92 | 27.27 | 21.51 | 0.382 (ns) |

|             |      | Fisher's index |      |            |      |      |      |            |
|-------------|------|----------------|------|------------|------|------|------|------------|
|             |      | Farm           |      |            | Dose |      |      |            |
| Type        | Time | F_15           | F_38 | p-value    | x0.1 | x1   | x2   | p-value    |
| Raw milk    | D0   | 3.11           | 2.47 | 0.058 (.)  | -    | -    | -    | -          |
| Cheese Core | D8   | 1.48           | 2.07 | 0.032 (*)  | 3.06 | 1.24 | 1.02 | 0.005 (**) |
|             | D28  | 2.27           | 2.86 | 0.021 (*)  | 3.41 | 2.27 | 2.02 | 0.156 (ns) |
| Cheese Rind | D28  | 2.87           | 2.89 | 0.340 (ns) | 3.26 | 3.03 | 2.35 | 0.432 (ns) |

**Table S5.** Statistical assessment (*p*-values) of bacterial profiles clustering and of intra-cluster dispersion calculated according to the farm and the dose, in the raw milk, the cheese cores and the cheese rinds. The *p*-value was calculated by a pairwise Adonis test for differences between doses, and by a TukeyHSD test for the dispersion of samples. \**p* < 0.05; \*\**p* < 0.01; \*\*\**p* < 0.001; tendency; ns non-significant.

|             |      | Bray-Curtis  |              |            |            |            |                  |                             |                             |            |                             |
|-------------|------|--------------|--------------|------------|------------|------------|------------------|-----------------------------|-----------------------------|------------|-----------------------------|
|             |      | Farm         |              | Dose       |            |            |                  |                             |                             |            |                             |
|             |      | Difference   | Dispersion   | Difference |            |            |                  | Dispersion                  |                             |            |                             |
| Type        | Time | F_15 vs F_38 | F_15 vs F_38 | x0.1 vs x1 | x0.1 vs x2 | x1 vs x2   | x0.1 vs x1 vs x2 | x0.1 vs x1                  | x0.1 vs x2                  | x1 vs x2   | x0.1 vs x1 vs x2            |
| Raw milk    | D0   | 0.001 (***)  | 0.017 (*)    | -          | -          | -          | -                | -                           | -                           | -          | -                           |
| Cheese core | D8   | 0.125 (ns)   | 0.350 (ns)   | 0.009 (**) | 0.009 (**) | 0.219 (ns) | 0.002 (**)       | 2.11x10 <sup>-6</sup> (***) | 1.22x10 <sup>-6</sup> (***) | 0.929 (ns) | 4.12x10 <sup>-7</sup> (***) |
|             | D28  | 0.021 (*)    | 0.294 (ns)   | 0.017 (*)  | 0.009 (**) | 0.245 (ns) | 0.008 (**)       | 0.001 (***)                 | 4.02x10 <sup>-4</sup> (***) | 0.794 (ns) | 2.59x10 <sup>-4</sup> (***) |
| Cheese rind | D28  | 0.289 (ns)   | 0.366 (ns)   | 0.071 (.)  | 0.009 (**) | 0.081 (.)  | 0.002 (**)       | 0.374 (ns)                  | 0.011 (*)                   | 0.150 (ns) | 0.014 (*)                   |

|             |      | Jaccard      |              |            |            |            |                  |                             |                             |            |                             |
|-------------|------|--------------|--------------|------------|------------|------------|------------------|-----------------------------|-----------------------------|------------|-----------------------------|
|             |      | Farm         |              | Dose       |            |            |                  |                             |                             |            |                             |
|             |      | Difference   | Dispersion   | Difference |            |            |                  | Dispersion                  |                             |            |                             |
| Type        | Time | F_15 vs F_38 | F_15 vs F_38 | x0.1 vs x1 | x0.1 vs x2 | x1 vs x2   | x0.1 vs x1 vs x2 | x0.1 vs x1                  | x0.1 vs x2                  | x1 vs x2   | x0.1 vs x1 vs x2            |
| Raw milk    | D0   | 0.001 (***)  | 0.017 (*)    | -          | -          | -          | -                | -                           | -                           | -          | -                           |
| Cheese core | D8   | 0.133 (ns)   | 0.350 (ns)   | 0.003 (**) | 0.003 (**) | 0.215 (ns) | 0.007 (**)       | 2.11x10 <sup>-6</sup> (***) | 1.22x10 <sup>-6</sup> (***) | 0.929 (ns) | 4.12x10 <sup>-7</sup> (***) |
|             | D28  | 0.035 (*)    | 0.294 (ns)   | 0.012 (*)  | 0.009 (**) | 0.256 (ns) | 0.012 (*)        | 0.001 (***)                 | 4.02x10 <sup>-4</sup> (***) | 0.794 (ns) | 2.59x10 <sup>-4</sup> (***) |
| Cheese rind | D28  | 0.279 (ns)   | 0.366 (ns)   | 0.075 (.)  | 0.006 (**) | 0.078 (.)  | 0.001 (***)      | 0.373 (ns)                  | 0.011 (*)                   | 0.150 (ns) | 0.014 (*)                   |

|             |      | Weighted Unifrac |              |            |            |            |                  |                             |                             |            |                             |
|-------------|------|------------------|--------------|------------|------------|------------|------------------|-----------------------------|-----------------------------|------------|-----------------------------|
|             |      | Farm             |              | Dose       |            |            |                  |                             |                             |            |                             |
|             |      | Difference       | Dispersion   | Difference |            |            |                  | Dispersion                  |                             |            |                             |
| Type        | Time | F_15 vs F_38     | F_15 vs F_38 | x0.1 vs x1 | x0.1 vs x2 | x1 vs x2   | x0.1 vs x1 vs x2 | x0.1 vs x1                  | x0.1 vs x2                  | x1 vs x2   | x0.1 vs x1 vs x2            |
| Raw milk    | D0   | 0.001 (***)      | 0.006 (**)   | -          | -          | -          | -                | -                           | -                           | -          | -                           |
| Cheese core | D8   | 0.062 (.)        | 0.233 (ns)   | 0.009 (**) | 0.009 (**) | 0.237 (ns) | 0.012 (*)        | 5.86x10 <sup>-5</sup> (***) | 3.88x10 <sup>-5</sup> (***) | 0.970 (ns) | 1.44x10 <sup>-5</sup> (***) |
|             | D28  | 0.073 (.)        | 0.246 (ns)   | 0.011 (*)  | 0.011 (*)  | 0.246 (ns) | 0.011 (*)        | 0.002 (**)                  | 0.004 (**)                  | 0.935 (ns) | 0.001 (***)                 |
| Cheese rind | D28  | 0.309 (ns)       | 0.613 (ns)   | 0.039 (*)  | 0.006 (**) | 0.085 (.)  | 0.002 (**)       | 0.832 (ns)                  | 0.054 (.)                   | 0.152 (ns) | 0.053 (.)                   |

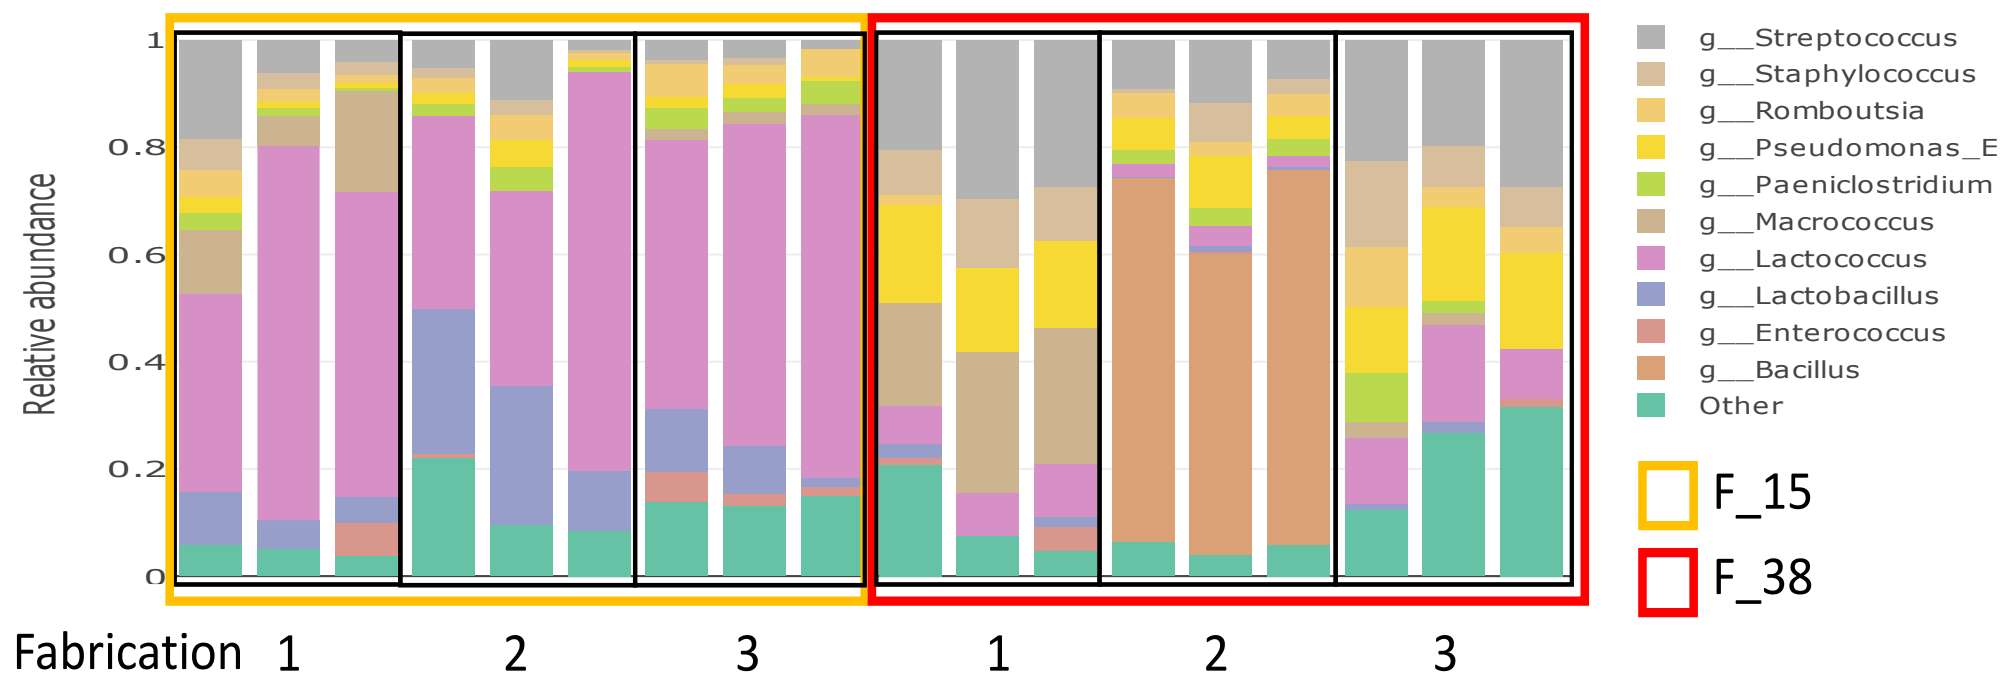

**Figure S1.** Relative abundance of the 10 major genera detected in the raw milk, organized by farms and days of cheese-making.

**Table S6.** Mean relative abundance for taxa differentially abundant between tested conditions (farm or lactic starter dose). UD: undetected. NA: not available because of no starter in raw milk.

|          | Family               | Farm  |       |            | Dose  |       |       |                    |
|----------|----------------------|-------|-------|------------|-------|-------|-------|--------------------|
|          |                      | F_15  | F_38  | difference | x0.1  | x1    | x2    | difference x0.1 vs |
| Milks    | f_Bacillaceae        | 0.000 | 0.216 | yes        | NA    | NA    | NA    | NA                 |
|          | f_Bifidobacteriaceae | 0.017 | 0.000 | yes        | NA    | NA    | NA    | NA                 |
|          | f_Corynebacteriaceae | 0.017 | 0.000 | yes        | NA    | NA    | NA    | NA                 |
|          | f_Lactobacillaceae   | 0.145 | 0.019 | yes        | NA    | NA    | NA    | NA                 |
|          | f_Pseudomonadaceae   | 0.021 | 0.135 | yes        | NA    | NA    | NA    | NA                 |
|          | f_Streptococcaceae   | 0.608 | 0.282 | yes        | NA    | NA    | NA    | NA                 |
| D8 Core  | f_Enterobacteriaceae | 0.007 | 0.033 | no         | 0.071 | 0.001 | 0.001 | x1 & x2            |
|          | f_Enterococcaceae    | 0.001 | 0.020 | no         | 0.036 | 0.001 | 0.000 | x2                 |
|          | f_Lactobacillaceae   | 0.005 | 0.001 | yes        | 0.004 | 0.003 | 0.002 | no                 |
|          | f_Streptococcaceae   | 0.982 | 0.925 | no         | 0.843 | 0.990 | 0.995 | x1 & x2            |
| D28 Core | f_Enterococcaceae    | 0.003 | 0.036 | yes        | 0.045 | 0.008 | 0.004 | no                 |
|          | f_Streptococcaceae   | 0.783 | 0.838 | no         | 0.709 | 0.828 | 0.863 | x1 & x2            |
| D28 Rind | f_Aerococcaceae      | 0.001 | UD    | no         | 0.002 | UD    | 0.000 | x2                 |
|          | f_Enterobacteriaceae | 0.089 | 0.274 | no         | 0.341 | 0.136 | 0.043 | x2                 |
|          | f_Staphylococcaceae  | 0.022 | 0.003 | no         | 0.035 | 0.004 | 0.001 | x2                 |
|          | f_Streptococcaceae   | 0.649 | 0.546 | no         | 0.235 | 0.647 | 0.878 | x1 & x2            |

|          | Genus                                    | Farm  |       |            | Dose  |       |       |                    |
|----------|------------------------------------------|-------|-------|------------|-------|-------|-------|--------------------|
|          |                                          | F_15  | F_38  | difference | x0.1  | x1    | x2    | difference x0.1 vs |
| Milks    | g_Bifidobacterium                        | 0.017 | 0.000 | yes        | NA    | NA    | NA    | NA                 |
|          | g_Lactocaseibacillus                     | 0.022 | 0.007 | yes        | NA    | NA    | NA    | NA                 |
|          | g_Lactobacillus                          | 0.119 | 0.011 | yes        | NA    | NA    | NA    | NA                 |
|          | g_Lactococcus                            | 0.545 | 0.083 | yes        | NA    | NA    | NA    | NA                 |
|          | g_Pseudomonas_E                          | 0.021 | 0.136 | yes        | NA    | NA    | NA    | NA                 |
|          | g_Streptococcus                          | 0.061 | 0.200 | yes        | NA    | NA    | NA    | NA                 |
| D8 Core  | g_Enterobacteriaceae_genus               | 0.006 | 0.007 | no         | 0.024 | 0.001 | 0.000 | x1 & x2            |
|          | g_Enterococcus                           | 0.001 | 0.020 | no         | 0.037 | 0.001 | 0.000 | x2                 |
|          | g_Lactocaseibacillus                     | 0.004 | 0.001 | yes        | 0.004 | 0.001 | 0.001 | no                 |
|          | g_group_Lactobacillus_Lentilactobacillus | 0.001 | 0.001 | no         | 0.000 | 0.001 | 0.001 | x2                 |
|          | g_Lactococcus                            | 0.044 | 0.058 | no         | 0.170 | 0.007 | 0.002 | x1 & x2            |
|          | g_Staphylococcus                         | 0.001 | 0.008 | yes        | 0.013 | 0.001 | UD    | no                 |
| D28 Core | g_Streptococcus                          | 0.926 | 0.861 | no         | 0.648 | 0.978 | 0.991 | x1 & x2            |
|          | g_Brevibacterium                         | 0.004 | 0.003 | no         | 0.009 | 0.001 | 0.001 | x1                 |
|          | g_Enterobacteriaceae_genus               | 0.005 | 0.003 | no         | 0.011 | 0.002 | 0.001 | x2                 |
|          | g_Enterococcus                           | 0.003 | 0.036 | yes        | 0.046 | 0.008 | 0.004 | no                 |
|          | g_Lactococcus                            | 0.049 | 0.087 | no         | 0.208 | 0.024 | 0.008 | x1 & x2            |
|          | g_Serratia                               | 0.000 | 0.018 | yes        | UD    | UD    | UD    | no                 |
| D28 Rind | g_Staphylococcus                         | UD    | 0.001 | no         | 0.001 | 0.000 | UD    | x1                 |
|          | g_Streptococcus                          | 0.715 | 0.738 | no         | 0.466 | 0.789 | 0.850 | x1 & x2            |
|          | g_Aerococcus                             | 0.001 | UD    | no         | 0.002 | UD    | 0.000 | x2                 |
|          | g_Brevibacterium                         | 0.182 | 0.061 | no         | 0.259 | 0.109 | 0.041 | x2                 |
|          | g_Macroccoccus                           | 0.004 | 0.002 | no         | 0.008 | UD    | 0.000 | x2                 |
|          | g_Staphylococcus                         | 0.005 | 0.001 | no         | 0.008 | 0.001 | 0.000 | x2                 |
| D28 Rind | g_Streptococcaceae_genus                 | 0.043 | 0.012 | no         | 0.007 | 0.033 | 0.041 | x2                 |
|          | g_Streptococcus                          | 0.420 | 0.451 | no         | 0.048 | 0.453 | 0.753 | x1 & x2            |

|          | Species                                                    | Farm  |       |            | Dose  |       |       |                    |
|----------|------------------------------------------------------------|-------|-------|------------|-------|-------|-------|--------------------|
|          |                                                            | F_15  | F_38  | difference | x0.1  | x1    | x2    | difference x0.1 vs |
| Milks    | s_Bifidobacterium_mongoliense                              | 0.017 | 0.000 | yes        | NA    | NA    | NA    | NA                 |
|          | s_Lactocaseibacillus_group_casei_paracasei_zeae            | 0.022 | 0.007 | yes        | NA    | NA    | NA    | NA                 |
|          | s_Lactobacillus_group_crispatus_gallinarum_helveticus      | 0.114 | 0.000 | yes        | NA    | NA    | NA    | NA                 |
|          | s_Lactococcus_lactis                                       | 0.547 | 0.084 | yes        | NA    | NA    | NA    | NA                 |
|          | s_Pseudomonas_group_canadensis_fluorescens                 | 0.021 | 0.136 | yes        | NA    | NA    | NA    | NA                 |
|          | s_Enterobacteriaceae_species                               | 0.006 | 0.007 | no         | 0.024 | 0.001 | 0.000 | x1 & x2            |
| D8 Core  | s_Enterococcus_faecalis                                    | 0.001 | 0.022 | yes        | 0.034 | 0.001 | UD    | no                 |
|          | s_Lactocaseibacillus_group_casei_paracasei_zeae            | 0.004 | 0.001 | yes        | 0.004 | 0.001 | 0.001 | no                 |
|          | s_Lactobacillus_delbrueckii                                | 0.001 | 0.001 | no         | 0.000 | 0.001 | 0.001 | x2                 |
|          | s_Lentilactobacillus_parabuchneri                          | 0.000 | 0.000 | yes        | UD    | 0.000 | 0.000 | no                 |
|          | s_Lactococcus_lactis                                       | 0.044 | 0.058 | no         | 0.168 | 0.007 | 0.002 | x1 & x2            |
|          | s_Staphylococcus_xylosus                                   | 0.001 | 0.008 | yes        | 0.013 | 0.001 | UD    | no                 |
| D28 Core | s_Streptococcus_thermophilus                               | 0.926 | 0.864 | no         | 0.649 | 0.978 | 0.991 | x1 & x2            |
|          | s_Brevibacterium_group_ammonilyticum_aurantiacum_marinum   | 0.001 | 0.002 | no         | 0.007 | 0.001 | 0.001 | x1                 |
|          | s_Enterobacteriaceae_species                               | 0.005 | 0.003 | no         | 0.011 | 0.002 | 0.001 | x2                 |
|          | s_Enterococcus_faecalis                                    | 0.001 | 0.026 | yes        | 0.035 | 0.004 | 0.001 | no                 |
|          | s_Lactobacillus_delbrueckii                                | 0.001 | 0.001 | no         | 0.000 | 0.001 | 0.001 | x1                 |
|          | s_Lactococcus_lactis                                       | 0.049 | 0.087 | no         | 0.207 | 0.021 | 0.008 | x2                 |
| D28 Rind | s_Serratia_group_grimesii_liquefaciens                     | 0.000 | 0.018 | yes        | 0.015 | 0.001 | UD    | no                 |
|          | s_Staphylococcus_xylosus                                   | UD    | 0.001 | no         | 0.001 | UD    | UD    | x1                 |
|          | s_Streptococcus_thermophilus                               | 0.715 | 0.738 | no         | 0.466 | 0.800 | 0.850 | x1 & x2            |
|          | s_Brevibacterium_group_antiquum_aurantiacum                | 0.050 | 0.015 | no         | 0.071 | 0.028 | 0.011 | x2                 |
|          | s_Brevibacterium_group_ammonilyticum_aurantiacum_marinum   | 0.133 | 0.045 | no         | 0.190 | 0.081 | 0.030 | x2                 |
|          | s_Streptococcus_group_loxodontisalivarius_saliviloxodontae | 0.043 | 0.012 | no         | 0.007 | 0.032 | 0.041 | x1 & x2            |
| D28 Rind | s_Streptococcus_thermophilus                               | 0.420 | 0.452 | no         | 0.048 | 0.453 | 0.754 | x1 & x2            |
